# Supplementary material for: Cost of the quanta SC+ hemodialysis system for self‐care in the United Kingdom
Source: PubMed Central journal article supplement (PMC9544577; doi:10.1111/hdi.12994), 2022-01-09
Supplement: HDI-26-287-s001.pdf [file HDI-26-287-s001.pdf]

## Supplement

### Item S1. Per treatment human resources expenses

|                                     | <b>3x weekly self-care home</b> | <b>3x weekly self-care in-center</b> | <b>3.5x weekly self-care home</b> | <b>3.5x weekly self-care in-center</b> |
|-------------------------------------|---------------------------------|--------------------------------------|-----------------------------------|----------------------------------------|
| Nursing                             | £12.62                          | £13.68                               | £10.82                            | £11.73                                 |
| Renal technician                    | £2.66                           | £2.66                                | £2.28                             | £2.28                                  |
| Social work                         | £1.28                           | £1.28                                | £1.10                             | £1.10                                  |
| Dietician                           | £1.09                           | £1.09                                | £0.93                             | £0.93                                  |
| Counselor                           | £1.87                           | £1.87                                | £1.60                             | £1.60                                  |
| Pharmacy                            | £0.25                           | £0.25                                | £0.21                             | £0.21                                  |
| Total number of treatments per year | 156                             | 156                                  | 182                               | 182                                    |
| <b>Total cost per treatment</b>     | <b>£19.77</b>                   | <b>£20.83</b>                        | <b>£16.94</b>                     | <b>£17.85</b>                          |

3.5x weekly dialysis assumes that pharmacy, counselor, dietician, and social work requirements are the same regardless of treatment frequency. Nursing and renal technician are expensed per treatment
